# Supplementary material for: A colorimetric and near-infrared fluorescent probe for biothiols and its application in living cells
Source: Royal Society of Chemistry journal article supplement (doi:10.1039/c4ra06596d), 2014-01-01
Supplement: c4ra06596d1.pdf [file c4ra06596d1.pdf]

**Electronic Supplementary Information (ESI)**

**for**

**A colorimetric and near-infrared fluorescent probe for  
biothiols and its application in living cells**

Dehuan Yu, Qiong Zhang, ShuangShuang Ding and Guoqiang Feng\*

*Key Laboratory of Pesticide and Chemical Biology of Ministry of Education, College of Chemistry,*

*Central China Normal University, 152 Luoyu Road, Wuhan 430079, P. R. China.*

E-mail: [gf256@mail.ccnu.edu.cn](mailto:gf256@mail.ccnu.edu.cn)

**Contents**

- 1. Structure characterizations of compound 2 and probe 1** .....Page S2-S5
- 2. Additional spectra** .....Page S5-S11

# 1. Structure characterizations of compound 2 and probe 1

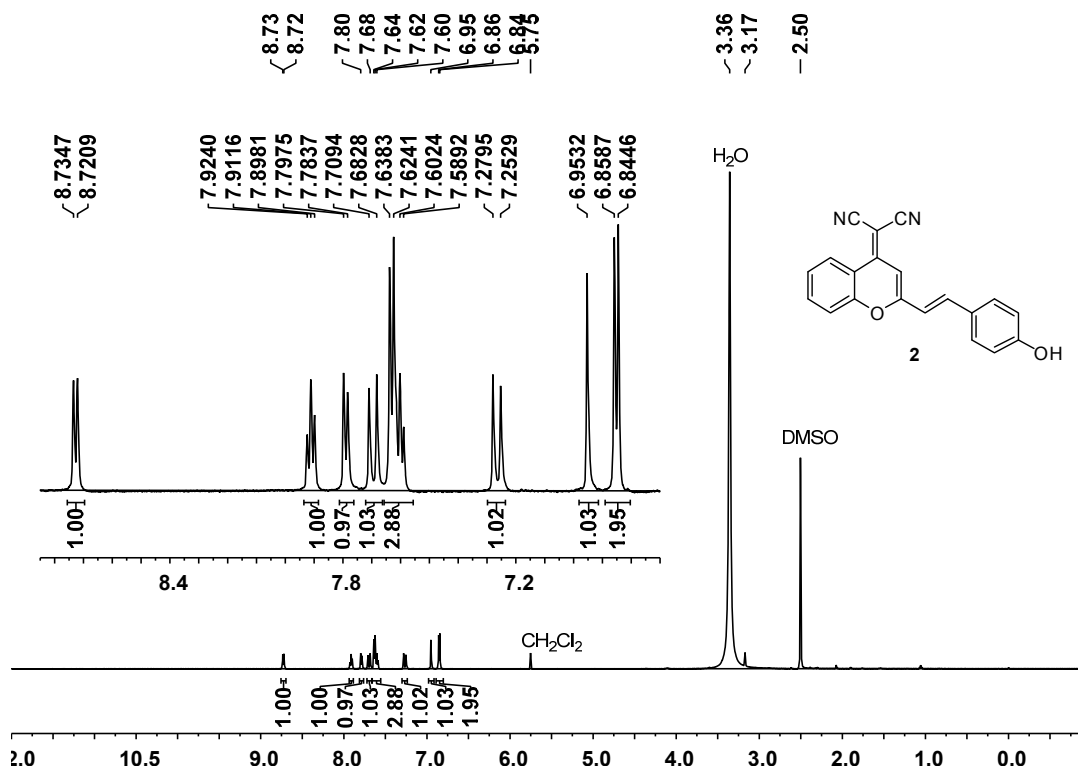

<sup>1</sup>H-NMR spectrum of compound 2 in *d*<sub>6</sub>-DMSO

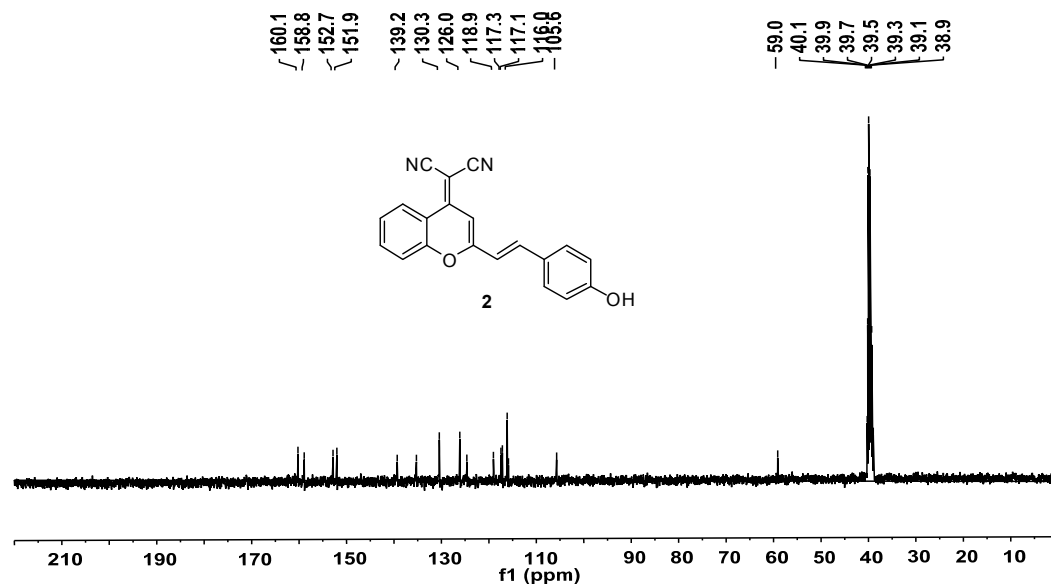

<sup>13</sup>C-NMR spectrum of compound 2 in *d*<sub>6</sub>-DMSO

YJDH010 #603 RT: 2.81 AV: 1 SB: 676 0.13-2.75 , 3.15-3.63 NL: 1.90E5  
T: + c Full ms [40.00-600.00]

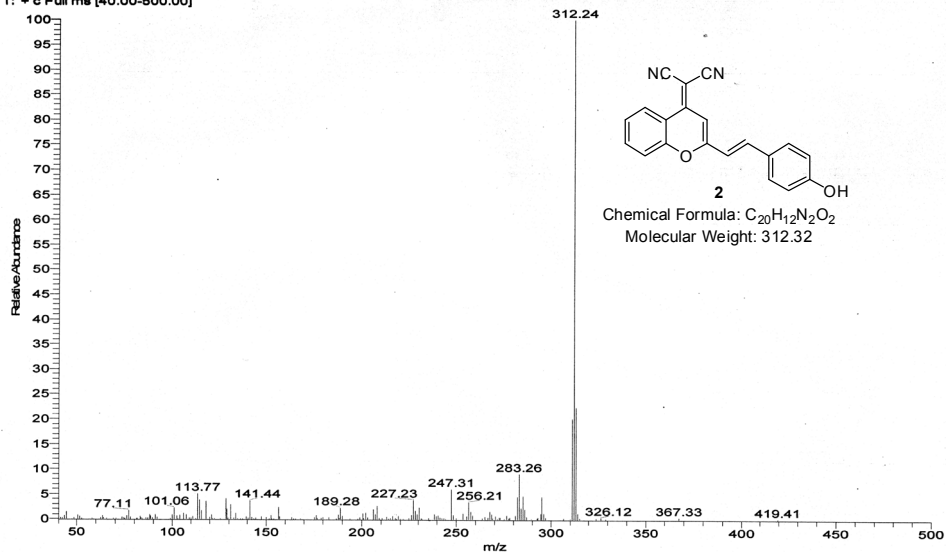

MS (EI) spectrum of compound 2

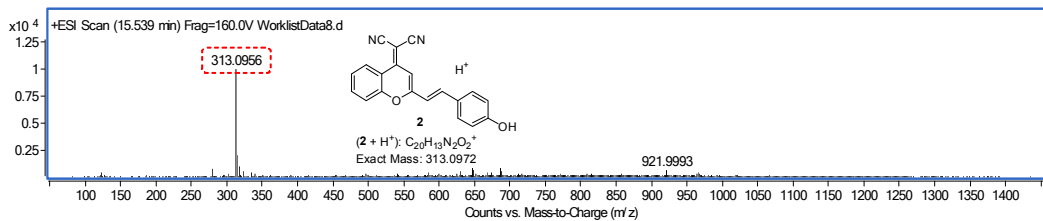

HR-MS spectrum of compound 2

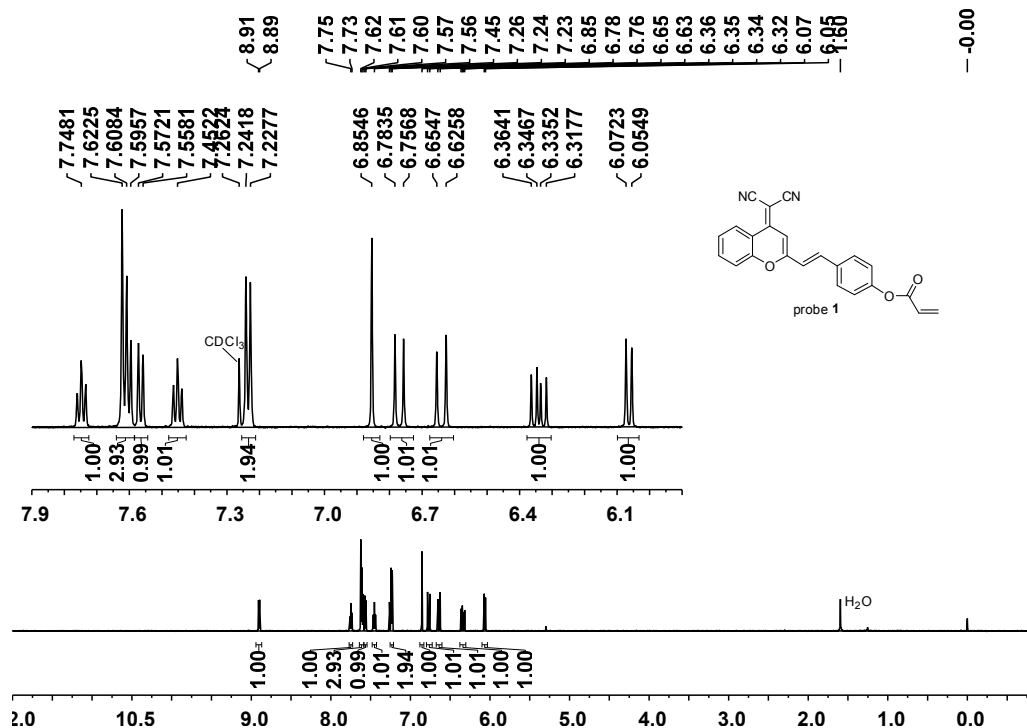

<sup>1</sup>H-NMR spectrum of probe 1 in CDCl<sub>3</sub>

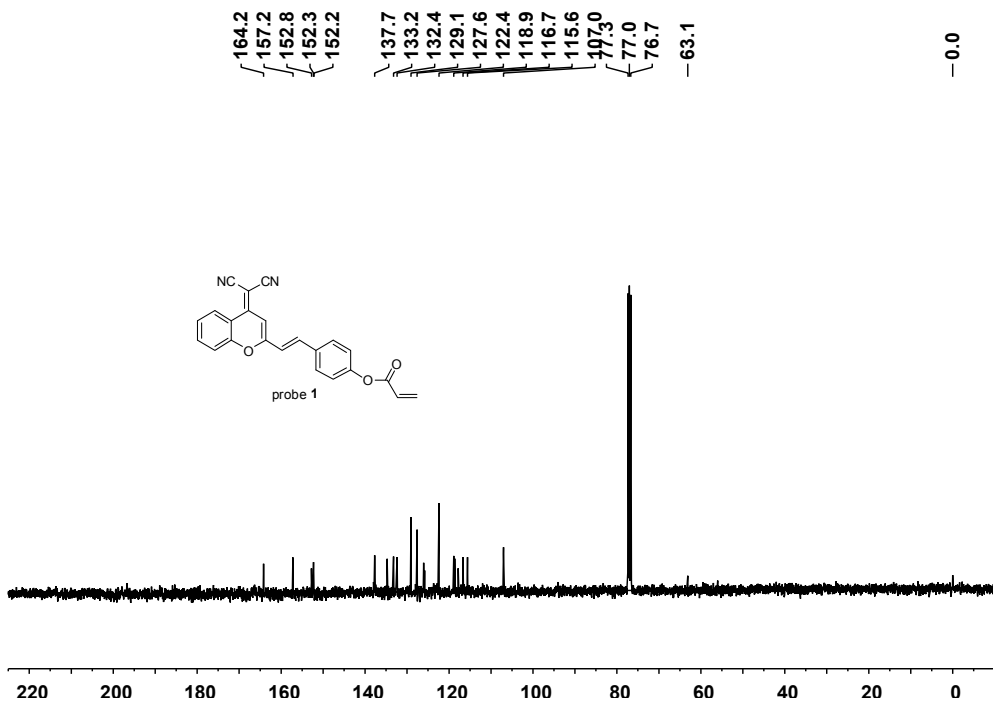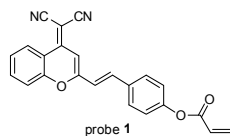

$^{13}\text{C}$ -NMR spectrum of probe 1 in  $d_6$ -DMSO

YUDH013 #632 RT: 3.24 AV: 1 SB: 677 0.04-2.95, 3.32-3.83 NL: 5.69E5  
T: + c Full ms [40.00-550.00]

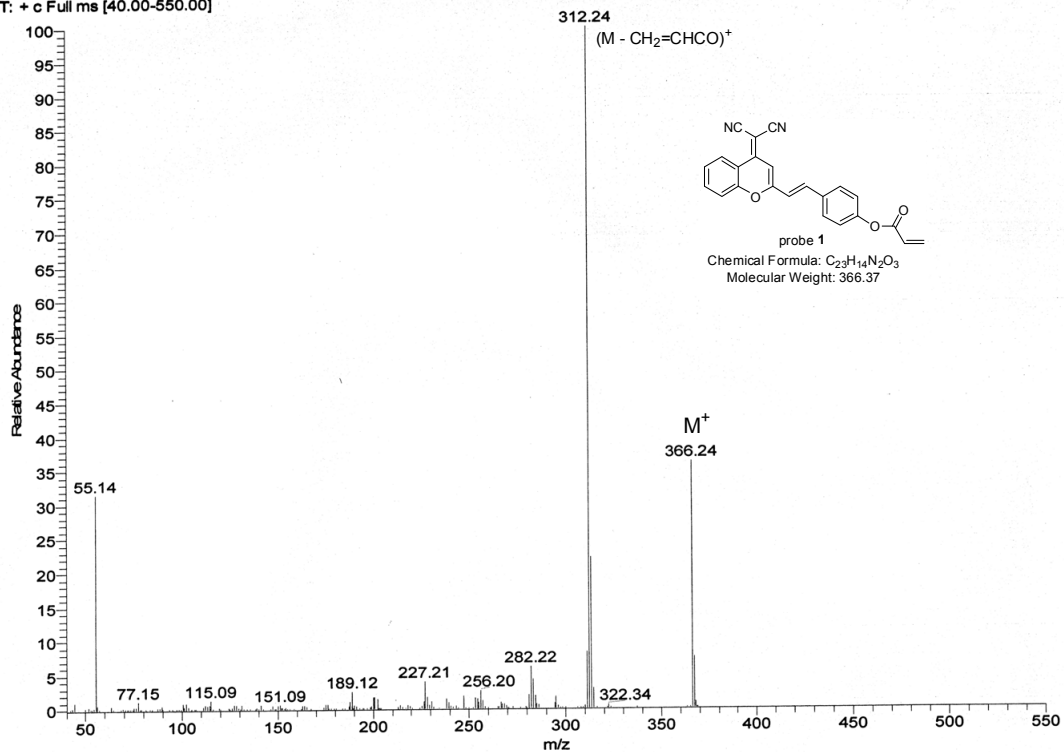

MS (EI) spectrum of probe 1

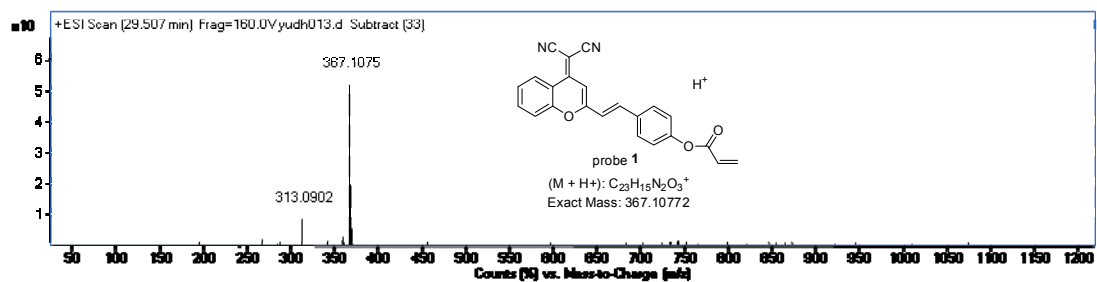

HR-MS spectrum of probe 1

## 2. Additional spectra

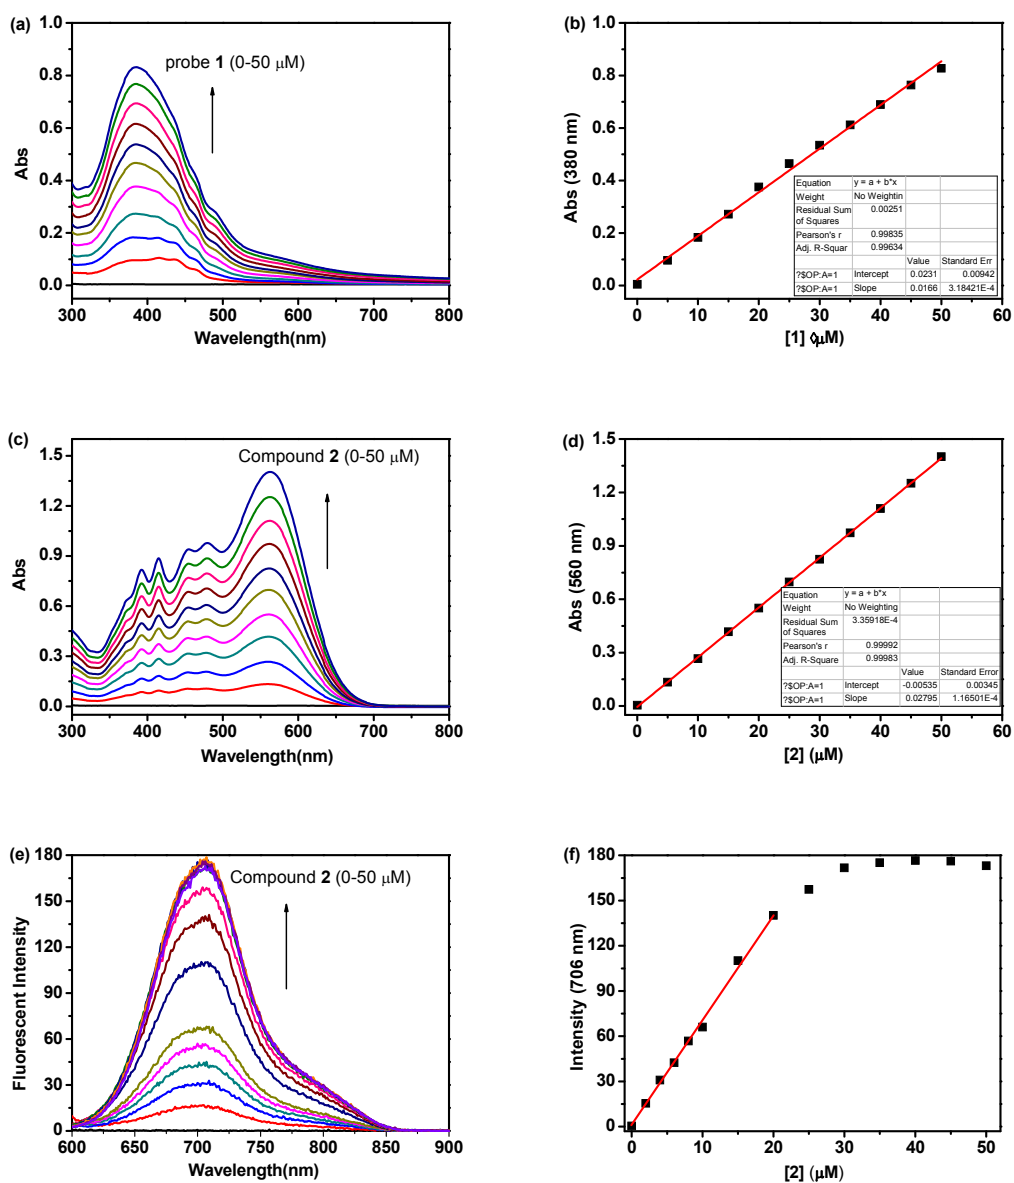

**Fig. S1** (a) Absorption spectra of probe 1 at different concentrations. (b) Absorbance intensity changes at 380 nm of probe 1 as a function of its concentration from 0-50 μM. (c) Absorption

spectra of compound **2** at different concentrations. (d) Absorbance intensity changes at 560 nm of compound **2** as a function of its concentration from 0-50  $\mu\text{M}$ . (e) Fluorescence spectra of compound **2** at different concentrations. (f) Fluorescence intensity changes of compound **2** at 706 nm as a function of its concentration from 0-50  $\mu\text{M}$ . All spectra were collected in PBS buffer (10 mM, pH 7.4) with 50% DMSO at 37  $^{\circ}\text{C}$ . For fluorescence measurement,  $\lambda_{\text{ex}} = 560$  nm with slit width: (10, 10).

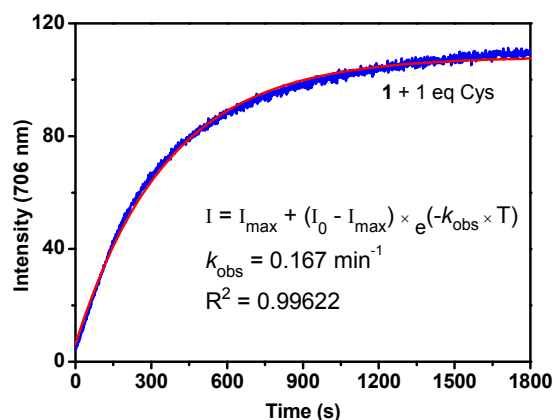

**Fig. S2** Time-dependent of fluorescence kinetics spectra of probe **1** (20  $\mu\text{M}$ ) upon addition of Cys (20  $\mu\text{M}$ ) in PBS buffer (10 mM, pH 7.4) with 50% DMSO at 37 $^{\circ}\text{C}$ . The reaction is monitored at 706 nm.  $\lambda_{\text{ex}} = 560$  nm, slit width: (10, 10).

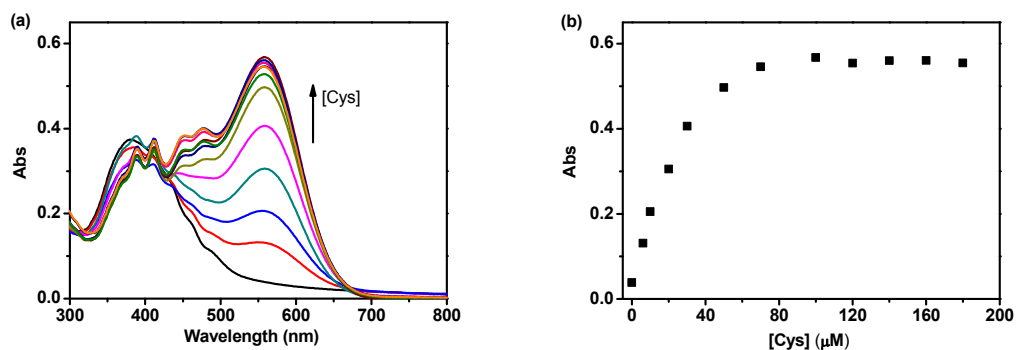

**Fig. S3** (a) Absorption spectra changes of probe **1** (20  $\mu\text{M}$ ) upon addition of different concentrations of Cys in PBS buffer (10 mM, pH 7.4) with 50% DMSO at 37  $^{\circ}\text{C}$ . Final concentration of Cys: 0, 6, 10, 30, 40, 50, 60, 70, 100, 120, 140, 160 and 180  $\mu\text{M}$ , respectively. (b) Absorbance changes at 560 nm of probe **1** (20  $\mu\text{M}$ ) against concentration of Cys. Each spectrum was obtained 30 min after Cys addition.

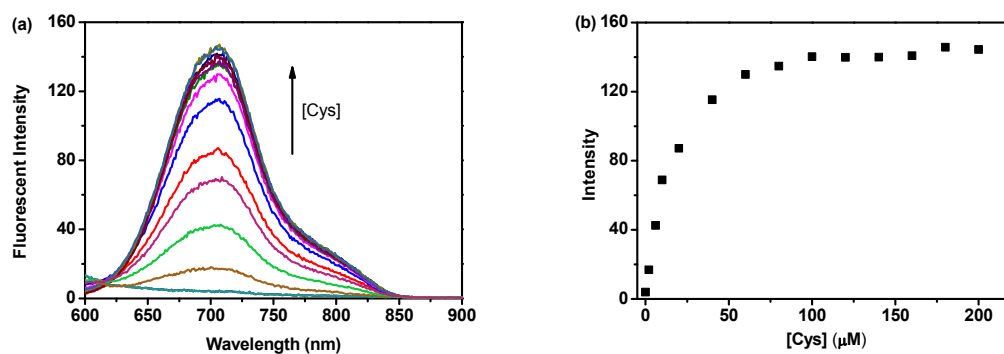

**Fig. S4** (a) Fluorescence spectra changes of probe **1** (20  $\mu\text{M}$ ) upon addition of different concentrations of Cys in PBS buffer (10 mM, pH 7.4) with 50% DMSO at 37  $^{\circ}\text{C}$ . Final concentration of Cys: 0, 2, 6, 10, 20, 40, 60, 80, 100, 120, 140, 160 and 180  $\mu\text{M}$ , respectively. (b) Fluorescence intensity changes at 706 nm of probe **1** (20  $\mu\text{M}$ ) against concentration of Cys. Each spectrum was obtained 30 min after Cys addition.  $\lambda_{\text{ex}} = 560$  nm, slit width: (10, 10).

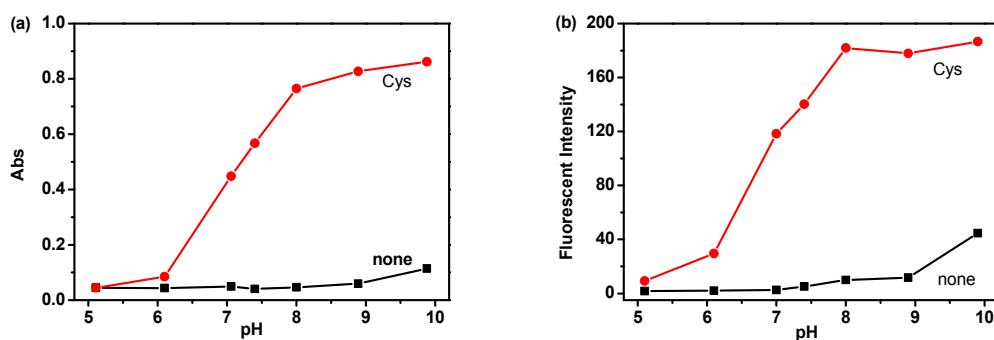

**Fig. S5** (a) Absorbance responses of probe **1** (20  $\mu\text{M}$ ) at 560 nm in the presence and absence of Cys (5 eq) under different pHs. (b) Fluorescence intensity responses of probe **1** (20  $\mu\text{M}$ ) at 706 nm in the presence and absence of Cys (5 eq) under different pHs. All experiment was performed in PBS buffer (10 mM) with 50% DMSO at 37  $^{\circ}\text{C}$  and each data was obtained 30 min after addition of Cys. For fluorescence measurements,  $\lambda_{\text{ex}} = 560$  nm, slit width: (10, 10).

### Data for investigation of the sensing mechanism

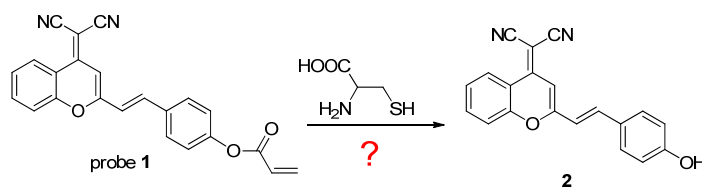

This experiment was performed according to a reported procedure (see Ref: X. Yang, Y. Guo and R. Strongin, *Angew. Chem., Int. Ed.*, 2011, **50**, 10690–10693). To a 100 mL flask, probe **1** (50 mg, 0.14 mmol) and Cys (21 mg, 1.25 eq) were combined in 30 mL of MeOH: H<sub>2</sub>O (90: 10, v/v) solution, and the mixture stirred at room temperature for 1 h. Then, Et<sub>3</sub>N (30  $\mu\text{L}$ ) was added and the solution stirred overnight. The solvents was removed under reduced pressure and the crude

product was subjected to column chromatography (eluted with  $\text{CH}_2\text{Cl}_2$ : MeOH, 5:1, v/v) to afford a red solid (23 mg), which was proved to be compound **2** (see below).

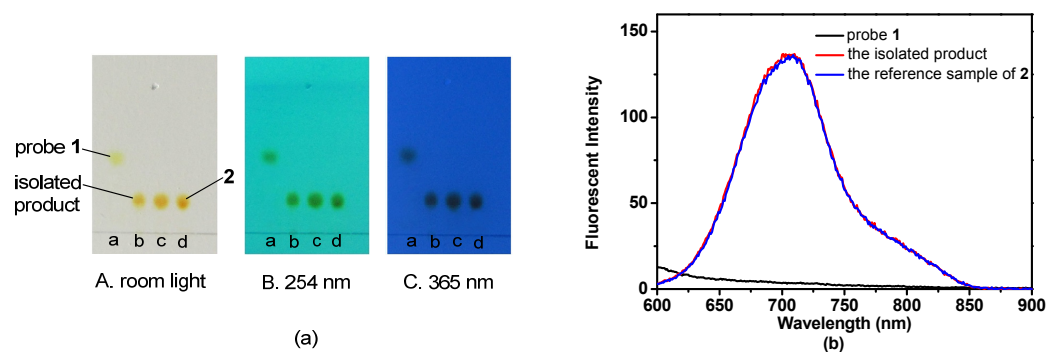

**Fig. S6** (a) The thin layer chromatography (TLC) plate under different light to compare probe **1**, the reference sample of **2** and the isolated product from the reaction mixture of probe **1** with Cys. Spots on the TLC plate are: a. probe **1**; b. the isolated reaction product of probe **1** and Cys; c. mixture of b and **2**; d. the reference sample of **2**. The eluent for TLC: hexane:ethyl acetate = 3:1 (v/v). (b) Fluorescent spectra of probe **1**, the isolated product and the reference sample of **2** in PBS buffer (10 mM, pH 7.4) with 50% DMSO at 37 °C.  $\lambda_{\text{ex}} = 560$  nm, slit width: (10,10).

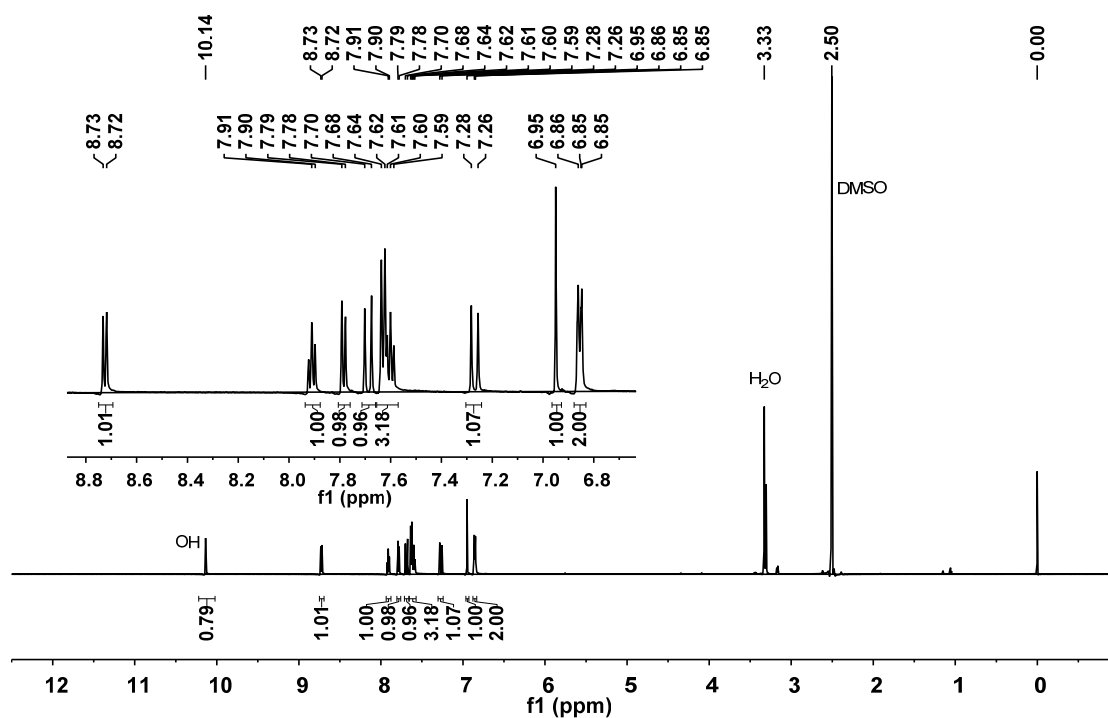

**Fig. S7**  $^1\text{H}$  NMR spectrum of the isolated product from the reaction of probe **1** and Cys, which is identical to that of the reference sample of **2** (see above).



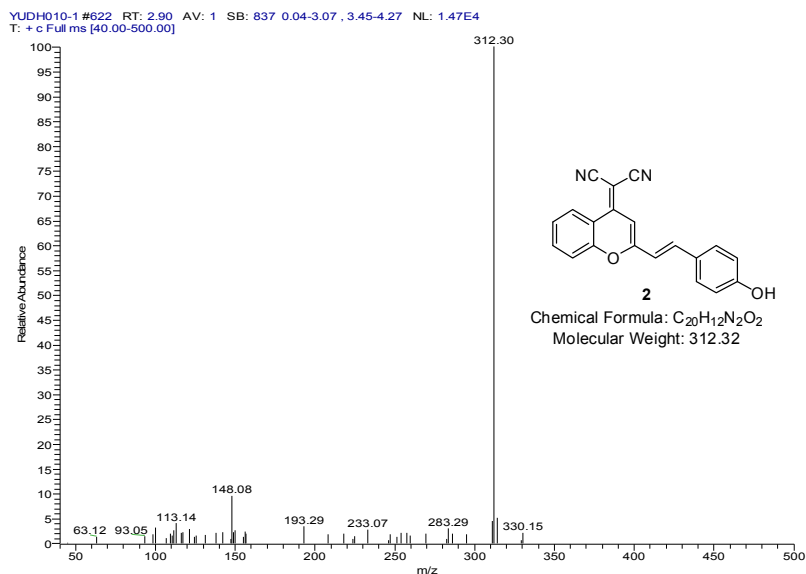

**Fig. S8** MS spectrum of the isolated product from the reaction of probe **1** and Cys, which showed the expected mass of **2**.

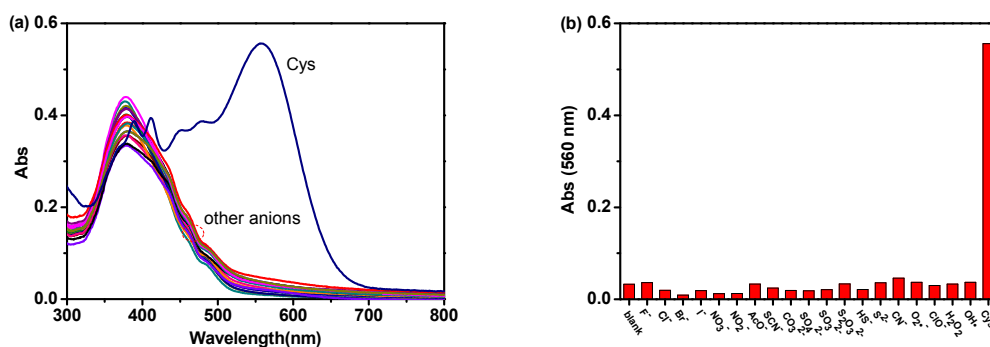

**Fig. S9** (a) Absorption spectral responses of probe **1** (20 μM) upon addition of 100 μM various anions and Cys. Anions are F<sup>-</sup>, Cl<sup>-</sup>, Br<sup>-</sup>, I<sup>-</sup>, NO<sub>3</sub><sup>-</sup>, NO<sub>2</sub><sup>-</sup>, AcO<sup>-</sup>, SCN<sup>-</sup>, CO<sub>3</sub><sup>2-</sup>, SO<sub>4</sub><sup>2-</sup>, SO<sub>3</sub><sup>2-</sup>, S<sub>2</sub>O<sub>3</sub><sup>2-</sup>, HS<sup>-</sup>, S<sup>2-</sup>, CN<sup>-</sup>, O<sub>2</sub><sup>•-</sup>, ClO<sup>-</sup>, H<sub>2</sub>O<sub>2</sub> and OH<sup>•</sup>. (b) A comparison of absorbance intensity changes of probe **1** (20 μM) at 560 nm upon addition of 100 μM various anions and Cys. All experiment was performed in PBS buffer (10 mM, pH 7.4) with 50% DMSO at 37 °C and each spectrum was obtained 30 min after addition of various anions.

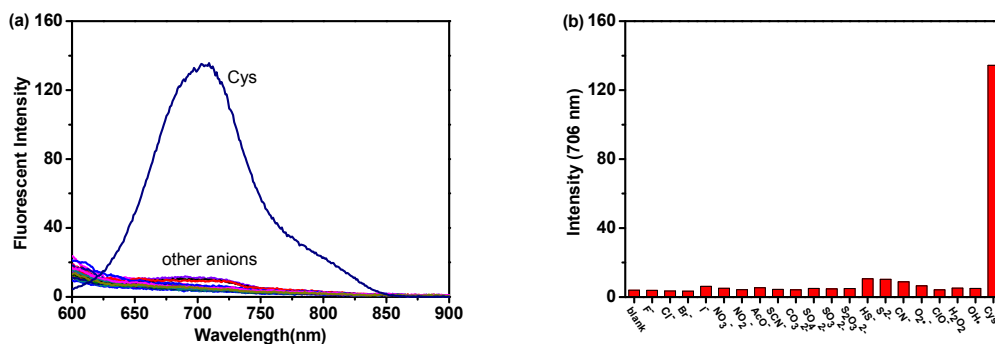

**Fig. S10** (a) Fluorescent spectral responses of probe **1** (20 μM) upon addition of 100 μM various anions and Cys. Anions are F<sup>-</sup>, Cl<sup>-</sup>, Br<sup>-</sup>, I<sup>-</sup>, NO<sub>3</sub><sup>-</sup>, NO<sub>2</sub><sup>-</sup>, AcO<sup>-</sup>, SCN<sup>-</sup>, CO<sub>3</sub><sup>2-</sup>, SO<sub>4</sub><sup>2-</sup>, SO<sub>3</sub><sup>2-</sup>,

$S_2O_3^{2-}$ ,  $HS^-$ ,  $S^{2-}$ ,  $CN^-$ ,  $O_2^{\bullet-}$ ,  $ClO^-$ ,  $H_2O_2$  and  $OH^\bullet$ . (b) A comparison of fluorescence intensity changes of probe **1** (20  $\mu$ M) at 706 nm upon addition of 100  $\mu$ M various anions and Cys. All experiment was performed in PBS buffer (10 mM, pH 7.4) with 50% DMSO at 37  $^\circ$ C and each spectrum was obtained 30 min after addition of various anions.  $\lambda_{ex}$  = 560 nm, slit width: (10, 10).

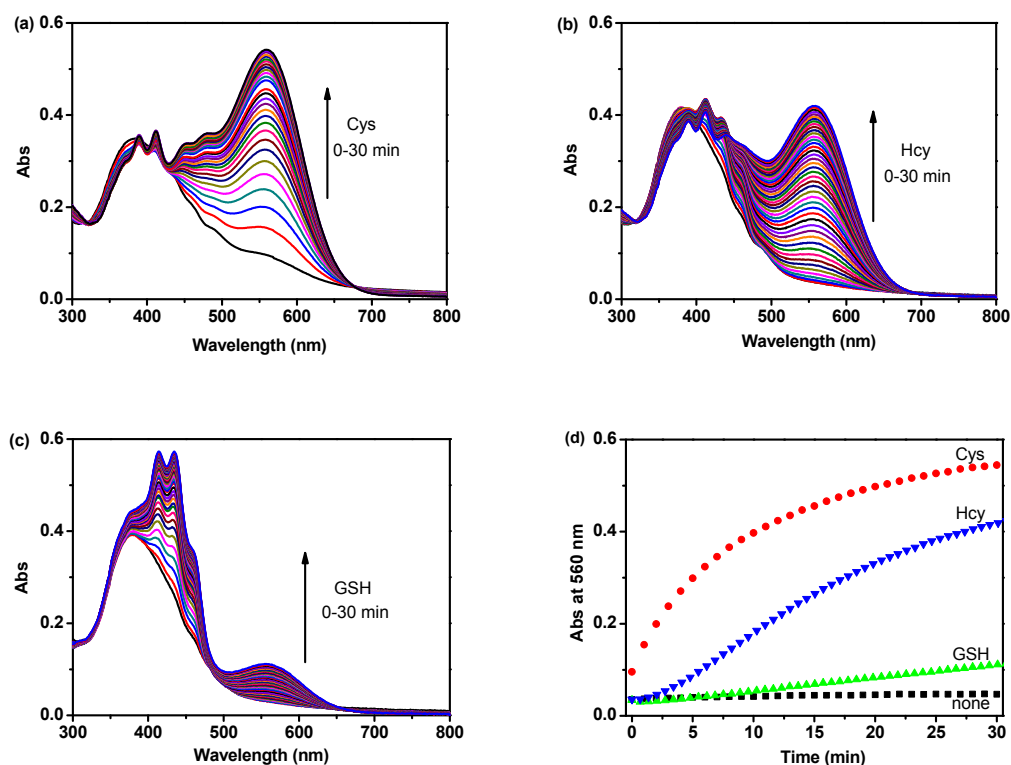

**Fig. S11** (a)-(c): Scanning kinetics of the UV-vis spectra changes of probe **1** (20  $\mu$ M) against time in the presence of 5 equiv of Cys (a), Hcy (b) and GSH (c), respectively. All spectra were measured in PBS buffer (10 mM, pH 7.4) with 50% DMSO at 37  $^\circ$ C. (d) The corresponding absorbance changes of probe **1** at 560 nm against time for Cys, Hcy and GSH.

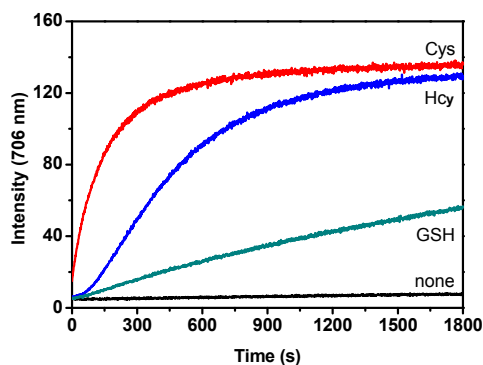

**Fig. S12** Fluorescence kinetics of probe **1** (20  $\mu$ M) at 706 nm in the absence and presence of biothiols (Cys, Hcy and GSH, 100  $\mu$ M each). All spectra were measured in PBS buffer (10 mM, pH 7.4) with 50% DMSO at 37  $^\circ$ C.  $\lambda_{ex}$  = 560 nm, slit width (10,10).

## Generation of reactive oxygen species (ROS)

### $\text{ClO}^-$

The NaOCl solution was added to the probe **1** testing solution at 25 °C.

### $\text{H}_2\text{O}_2$

$\text{H}_2\text{O}_2$  was added and the mixtures were stirred for 1 hour at 25 °C.

### $\text{OH}\cdot$

Hydroxyl radicals were generated by the addition of  $\text{Fe}^{2+}$  and  $\text{H}_2\text{O}_2$  at room temperature in PBS buffer (pH 7.4) and the mixture was then stirred for 30 min. (Ref. Y. Zhou, J.-Y. Li, K.-H. Chu, K. Liu, C. Yao, J.-Y. Li, *Chem Commun.* 2012, **48**, 4677–4679.)

### $\text{O}_2\cdot^-$

$\text{O}_2\cdot^-$  was generated by an improved pyrogallol autoxidation method reported recently (Ref. X. Li, *J. Agric. Food Chem.*, 2012, **60**, 6418–6424).
